# Supplementary material
Source: PubMed Central journal article supplement (PMC6085992)
Supplement: blood821629-suppl1.pdf [file blood821629-suppl1.pdf]

## **Appendix 1: Supplemental Methods**

### **Classifications and criteria for responses to quizartinib**

Responses to quizartinib were based on the Cheson criteria<sup>21</sup> and classified in a hierarchical fashion as complete remission (CR; <5% bone marrow blasts, ≤1% peripheral blood blasts [if available], no Auer rods, transfusion independence [defined as no red blood cell (RBC) transfusions within 4 weeks prior to disease assessment and no platelet transfusions within 1 week prior to disease assessment], absolute neutrophil count  $\geq 1 \times 10^9/L$ , and platelet count  $\geq 100 \times 10^9/L$ ) and CR with incomplete platelet recovery (CRp; same as CR except platelet count  $< 100 \times 10^9/L$ ; still requires RBC and platelet transfusion independence). The criteria were modified for CR with incomplete hematologic recovery (CRi) to be as follows: <5% bone marrow blasts, ≤1% peripheral blood blasts (if available), no Auer rods, and no requirement for transfusion independence (modification from Cheson). Patients satisfying the above-mentioned criteria with incomplete neutrophil recovery ( $< 1 \times 10^9/L$ ) were still classified as CRi. Similarly, those with incomplete platelet recovery but who were transfusion dependent were also still classified as CRi, as were those with complete platelet and neutrophil recovery but who remained transfusion dependent. Partial remission (PR) was defined as a decrease in bone marrow blasts of  $\geq 50\%$  from baseline (to total bone marrow blasts of 5% to 25%), and no requirement for transfusion independence.

### Appendix 1: Supplemental Table 1

#### Patients taking concomitant medications with a potential for QT/QTc interval prolongation or strong inhibitors/inducers of CYP3A (Safety population)

|                                        | Quizartinib<br>30-mg arm*<br>(n = 38) | Quizartinib<br>60-mg arm†<br>(n = 36)‡ | Total<br>(N = 74) |
|----------------------------------------|---------------------------------------|----------------------------------------|-------------------|
| Potential QT/QTc-prolonging medication |                                       |                                        |                   |
| Overall                                | 9 (23.7)                              | 9 (25.0)                               | 18 (24.3)         |
| Azithromycin                           | 4 (10.5)                              | 5 (13.9)                               | 9 (12.2)          |
| Clarithromycin§                        | 1 (2.6)                               | 0                                      | 1 (1.4)           |
| Erythromycin                           | 0                                     | 1 (2.8)                                | 1 (1.4)           |
| Prochlorperazine                       | 3 (7.9)                               | 3 (8.3)                                | 6 (8.1)           |
| Amiodarone                             | 2 (5.3)                               | 0                                      | 2 (2.7)           |
| Moxifloxacin                           | 0                                     | 1 (2.8)                                | 1 (1.4)           |
| Strong CYP3A inhibitors                |                                       |                                        |                   |
| Overall                                | 18 (47.4)                             | 21 (58.3)                              | 39 (52.7)         |
| Voriconazole                           | 11 (28.9)                             | 12 (33.3)                              | 23 (31.1)         |
| Posaconazole                           | 7 (18.4)                              | 11 (30.6)                              | 18 (24.3)         |
| Itraconazole                           | 0                                     | 1 (2.8)                                | 1 (1.4)           |
| Ketoconazole                           | 1 (2.6)                               | 0                                      | 1 (1.4)           |
| Strong/Moderate CYP3A inducer          |                                       |                                        |                   |
| Overall                                | 1 (2.6)                               | 0                                      | 1 (1.4)           |
| Modafinil                              | 1 (2.6)                               | 0                                      | 1 (1.4)           |

---

Quizartinib 30 mg and 60 mg are equivalent to 26.5 mg and 53 mg free base, respectively.

CYP3A, cytochrome P450-isozyme3A.

\*30-mg starting dose with permitted escalation to 60 mg for lack of or loss of initial response.

†60-mg starting dose with permitted escalation to 90 mg for lack of or loss of initial response.

‡Two patients were randomized but did not receive drug owing to ineligibility.

§Clarithromycin is a strong CYP3A inhibitor.

## Appendix 2: Supplemental Table 2

**Grade 3 or higher TEAEs (regardless of relationship to study treatment) reported in ≥10% of patients per dose group (safety population)**

| TEAE by preferred term‡            | Quizartinib 30-mg arm*<br>(n = 38) |            | Quizartinib 60-mg arm†<br>(n = 36) |            |
|------------------------------------|------------------------------------|------------|------------------------------------|------------|
|                                    | Grade ≥3                           | All grades | Grade ≥3                           | All grades |
| Overall, n (%)                     | 31 (81.6)                          | 37 (97.4)  | 32 (88.9)                          | 36 (100)   |
| Febrile neutropenia                | 12 (31.6)                          | 12 (31.6)  | 13 (36.1)                          | 13 (36.1)  |
| Anemia                             | 14 (36.8)                          | 18 (47.4)  | 6 (16.7)                           | 9 (25.0)   |
| Thrombocytopenia                   | 10 (26.3)                          | 10 (26.3)  | 7 (19.4)                           | 7 (19.4)   |
| Neutropenia                        | 1 (2.6)                            | 1 (2.6)    | 5 (13.9)                           | 5 (13.9)   |
| Pyrexia                            | 4 (10.5)                           | 11 (28.9)  | 3 (8.3)                            | 14 (38.9)  |
| Pneumonia                          | 3 (7.9)                            | 3 (7.9)    | 6 (16.7)                           | 8 (22.2)   |
| Blood bilirubin increased          | 2 (5.3)                            | 3 (7.9)    | 4 (11.1)                           | 4 (11.1)   |
| Alanine aminotransferase increased | 0                                  | 3 (7.9)    | 4 (11.1)                           | 5 (13.9)   |

Quizartinib 30 mg and 60 mg are equivalent to 26.5 mg and 53 mg free base, respectively.  
TEAE, treatment-emergent adverse event.

\*30-mg starting dose with permitted escalation to 60 mg for lack of or loss of initial response.

†60-mg starting dose with permitted escalation to 90 mg for lack of or loss of initial response.

‡Patients may have more than 1 TEAE per preferred term. Patients are counted once per preferred term.

## Appendix 3: Supplemental Table 3

## Summary of clinically significant values in liver function tests (safety population)

| Parameter                                                              | Criteria                                                           | Quizartinib            | Quizartinib            | Total<br>(N = 74) |
|------------------------------------------------------------------------|--------------------------------------------------------------------|------------------------|------------------------|-------------------|
|                                                                        |                                                                    | 30-mg arm*<br>(n = 38) | 60-mg arm†<br>(n = 36) |                   |
| ALT, n/N (%)                                                           | >3 × ULN                                                           | 7/38 (18.4)            | 8/36 (22.2)            | 15/74 (20.3)      |
|                                                                        | >5 × ULN                                                           | 1/38 (2.6)             | 3/36 (8.3)             | 4/74 (5.4)        |
|                                                                        | >10 × ULN                                                          | 0                      | 0                      | 0                 |
|                                                                        | >20 × ULN                                                          | 0                      | 0                      | 0                 |
| AST, n/N (%)                                                           | >3 × ULN                                                           | 2/38 (5.3)             | 2/35 (5.7)             | 4/73 (5.5)        |
|                                                                        | >5 × ULN                                                           | 0                      | 0                      | 0                 |
|                                                                        | >10 × ULN                                                          | 0                      | 0                      | 0                 |
|                                                                        | >20 × ULN                                                          | 0                      | 0                      | 0                 |
| ALT or AST, n/N (%)                                                    | >3 × ULN                                                           | 8/38 (21.1)            | 8/36 (22.2)            | 16/74 (21.6)      |
| Total bilirubin, n/N (%)                                               | >2 × ULN                                                           | 5/38 (13.2)            | 5/36 (13.9)            | 10/74 (13.5)      |
| Alkaline phosphatase, n/N (%)                                          | >1.5 × ULN                                                         | 15/38 (39.5)           | 12/36 (33.3)           | 27/74 (36.5)      |
| ALT and/or AST and total bilirubin, n/N (%)                            | ALT and/or AST >3 × ULN and Total Bilirubin >2 × ULN               | 2/38 (5.3)             | 0                      | 2/74 (2.7)        |
| ALT and/or AST and total bilirubin without an increase in ALP, n/N (%) | ALT and/or AST >3 × ULN and Total Bilirubin >2 × ULN and ALP < ULN | 0                      | 0                      | 0                 |

Quizartinib 30 mg and 60 mg are equivalent to 26.5 mg and 53 mg free base, respectively.

---

Maximum value on treatment is presented for each liver function parameter.

The denominators for percentages are based on number of subjects who had at least 1 non-missing value during treatment in each treatment group.

ALP, alkaline phosphatase; ALT, alanine aminotransferase; AST, aspartate aminotransferase; and ULN, upper limit of normal.

\*30-mg starting dose with permitted escalation to 60 mg for lack of or loss of initial response.

†60-mg starting dose with permitted escalation to 90 mg for lack of or loss of initial response.

**CONSORT Checklist**

| PAPER SECTION<br>And topic                    | Item | Description                                                                                                                                                                                              | Reported<br>on Page # |
|-----------------------------------------------|------|----------------------------------------------------------------------------------------------------------------------------------------------------------------------------------------------------------|-----------------------|
| <i>TITLE &amp;<br/>ABSTRACT</i>               | 1    | <u>How participants were allocated to interventions</u> (e.g., "random allocation", "randomized", or "randomly assigned").                                                                               | 1, 5                  |
| <i>INTRODUCTION</i><br>Background             | 2    | <u>Scientific background and explanation of rationale.</u>                                                                                                                                               | 6, 7                  |
| <i>METHODS</i><br>Participants                | 3    | <u>Eligibility criteria for participants and the settings and locations where the data were collected.</u>                                                                                               | 8, 9                  |
| Interventions                                 | 4    | <u>Precise details of the interventions intended for each group and how and when they were actually administered.</u>                                                                                    | 8                     |
| Objectives                                    | 5    | <u>Specific objectives and hypotheses.</u>                                                                                                                                                               | 10                    |
| Outcomes                                      | 6    | <u>Clearly defined primary and secondary outcome measures</u> and, when applicable, any <u>methods used to enhance the quality of measurements</u> (e.g., multiple observations, training of assessors). | 10,11                 |
| Sample size                                   | 7    | <u>How sample size was determined</u> and, when applicable, <u>explanation of any interim analyses and stopping rules.</u>                                                                               | 11                    |
| Randomization --<br>Sequence<br>generation    | 8    | <u>Method used to generate the random allocation sequence, including details of any restrictions</u> (e.g., blocking, stratification)                                                                    | 8                     |
| Randomization --<br>Allocation<br>concealment | 9    | <u>Method used to implement the random allocation sequence</u> (e.g., numbered containers or central telephone), clarifying whether the sequence was concealed until interventions                       | 8                     |

|                                    |    |                                                                                                                                                                                                                                                                                                                                                                |                    |
|------------------------------------|----|----------------------------------------------------------------------------------------------------------------------------------------------------------------------------------------------------------------------------------------------------------------------------------------------------------------------------------------------------------------|--------------------|
|                                    |    | were assigned.                                                                                                                                                                                                                                                                                                                                                 |                    |
| Randomization --<br>Implementation | 10 | <u>Who generated the allocation sequence, who enrolled participants, and who assigned participants to their groups.</u>                                                                                                                                                                                                                                        | N/A                |
| Blinding (masking)                 | 11 | <u>Whether or not participants, those administering the interventions, and those assessing the outcomes were blinded to group assignment. When relevant, how the success of blinding was evaluated.</u>                                                                                                                                                        | 8                  |
| Statistical methods                | 12 | <u>Statistical methods used to compare groups for primary outcome(s); Methods for additional analyses, such as subgroup analyses and adjusted analyses.</u>                                                                                                                                                                                                    | 11,12              |
| RESULTS<br>Participant flow        | 13 | <u>Flow of participants through each stage (a diagram is strongly recommended).</u><br>Specifically, for each group report the numbers of participants randomly assigned, receiving intended treatment, completing the study protocol, and analyzed for the primary outcome. <u>Describe protocol deviations from study as planned, together with reasons.</u> | 12; Figure 1       |
| Recruitment                        | 14 | <u>Dates defining the periods of recruitment and follow-up.</u>                                                                                                                                                                                                                                                                                                | 12                 |
| Baseline data                      | 15 | <u>Baseline demographic and clinical characteristics of each group.</u>                                                                                                                                                                                                                                                                                        | 12, 13;<br>Table 1 |
| Numbers analyzed                   | 16 | <u>Number of participants (denominator) in each group included in each analysis and whether the analysis was by "intention-to-treat".</u> State the results in absolute numbers when feasible (e.g., 10/20, not 50%).                                                                                                                                          | 13                 |
| Outcomes and                       | 17 | <u>For each primary and secondary outcome, a</u>                                                                                                                                                                                                                                                                                                               | 13, 14             |



|                              |    |                                                                                                                                                                                              |        |
|------------------------------|----|----------------------------------------------------------------------------------------------------------------------------------------------------------------------------------------------|--------|
| estimation                   |    | <u>summary of results for each group, and the estimated effect size and its precision (e.g., 95% confidence interval).</u>                                                                   |        |
| Ancillary analyses           | 18 | <u>Address multiplicity by reporting any other analyses performed</u> , including subgroup analyses and adjusted analyses, indicating those pre-specified and those exploratory.             | 14     |
| Adverse events               | 19 | <u>All important adverse events or side effects in each intervention group.</u>                                                                                                              | 14-16  |
| DISCUSSION<br>Interpretation | 20 | <u>Interpretation of the results</u> , taking into account study hypotheses, sources of potential bias or imprecision and the dangers associated with multiplicity of analyses and outcomes. | 16-20  |
| Generalizability             | 21 | <u>Generalizability (external validity) of the trial findings.</u>                                                                                                                           | 17     |
| Overall evidence             | 22 | <u>General interpretation of the results in the context of current evidence.</u>                                                                                                             | 16, 17 |
